# Supplementary material
Source: Springer Nature journal article supplement (https://www.springermedizin.de/resource/supplementary/13023_2013_704_MOESM2_ESM.pdf/9642874)

**A**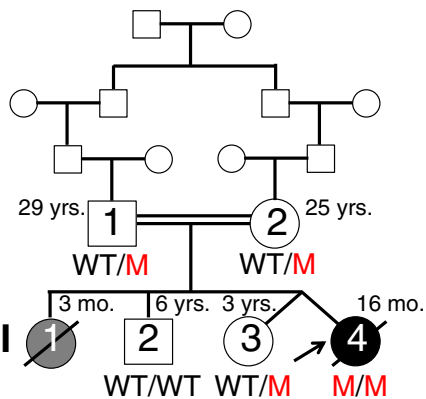**B**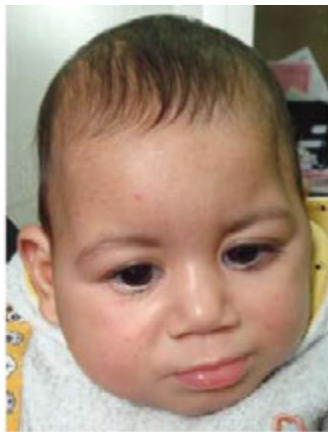**C**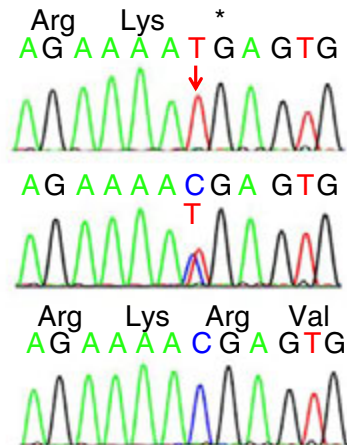**D**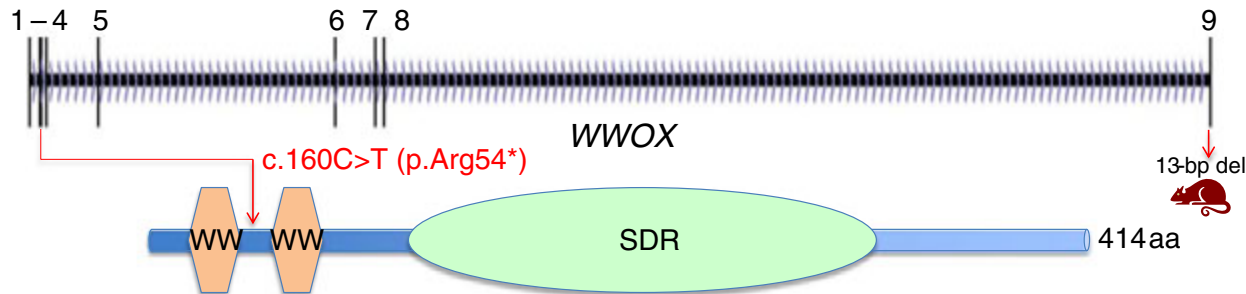

Supplement: MOESM2 [file 9642874]
